# Supplementary material
Source: bioRxiv or medRxiv preprint supplement (https://www.biorxiv.org/highwire/filestream/54900/field_highwire_adjunct_files/0/136358-1.pdf)

# Add. file 1

a

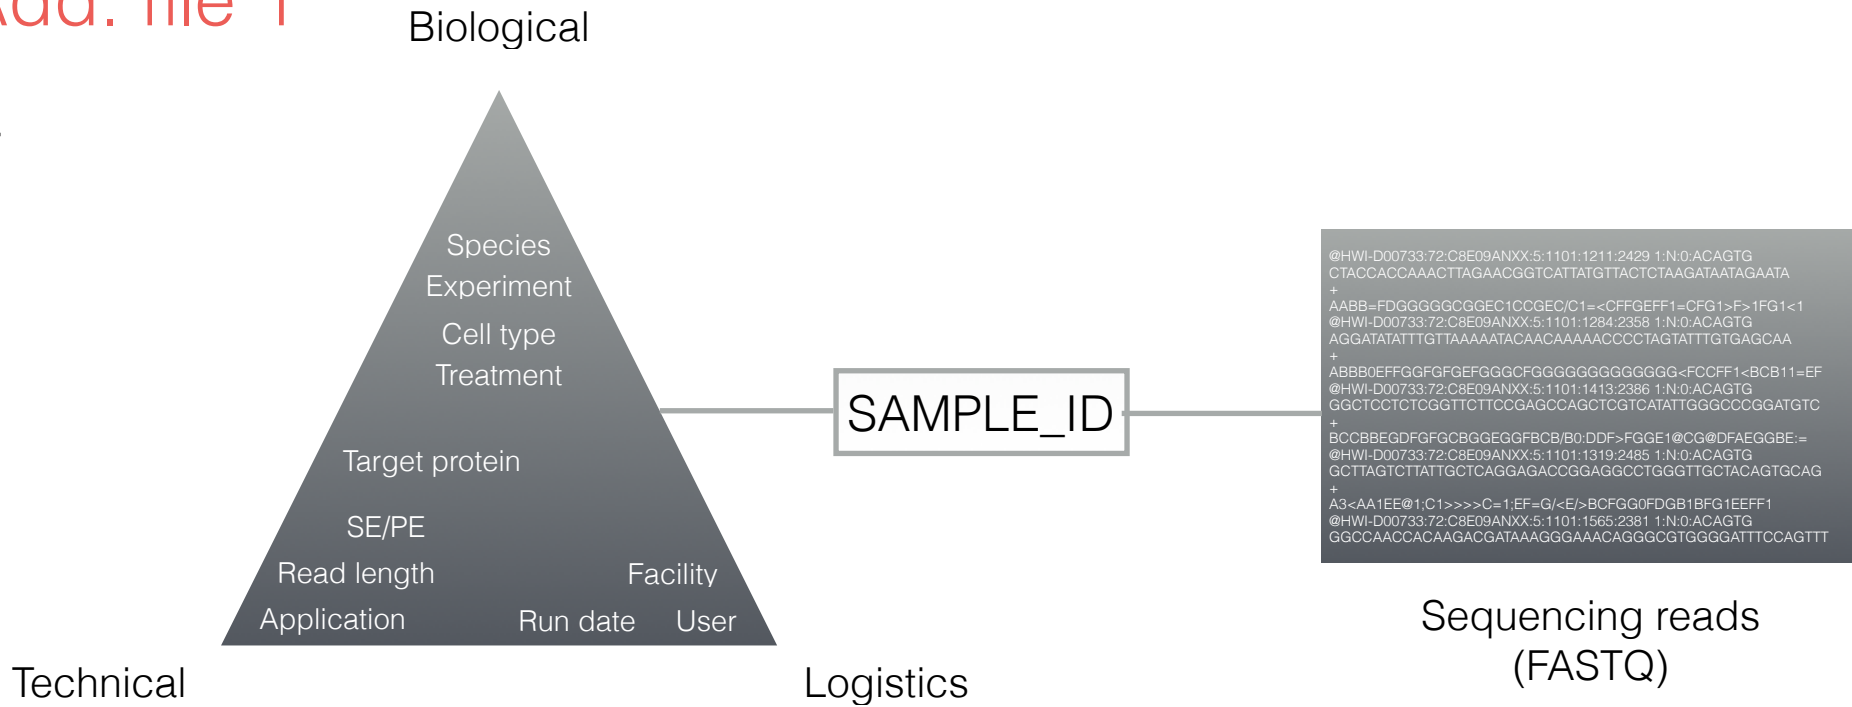

b

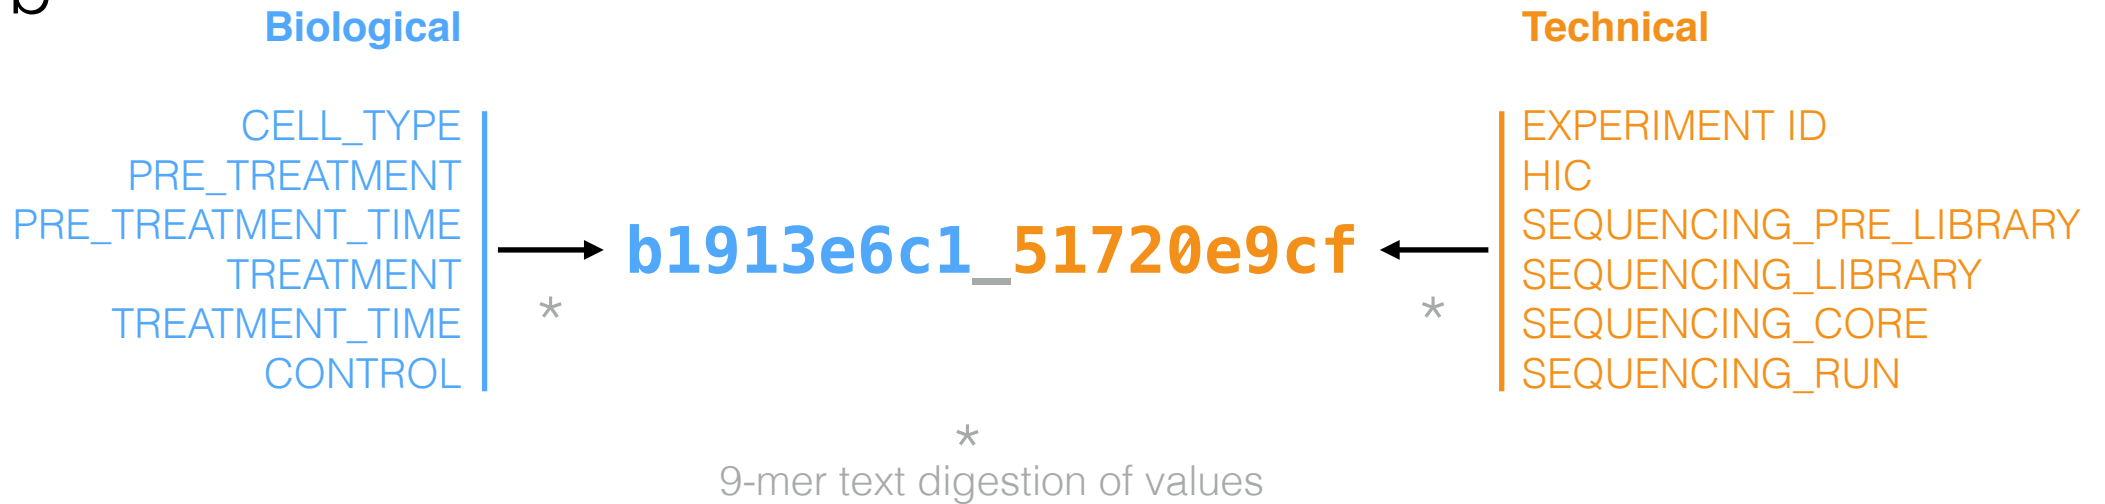

Supplement: Supplementary file [file 136358-1.pdf]
